# Supplementary material
Source: Royal Society of Chemistry journal article supplement (doi:10.1039/d6ja00025h)
Supplement: d6ja00025h1.pdf [file d6ja00025h1.pdf]

## Continuous-flow analyses of calcium isotopes using the Neoma MC-ICPMS/MS with H<sub>2</sub> or SF<sub>6</sub>

Emmanuelle Albat, Philippe Télouk, Vincent Balter

### Supplementary Information

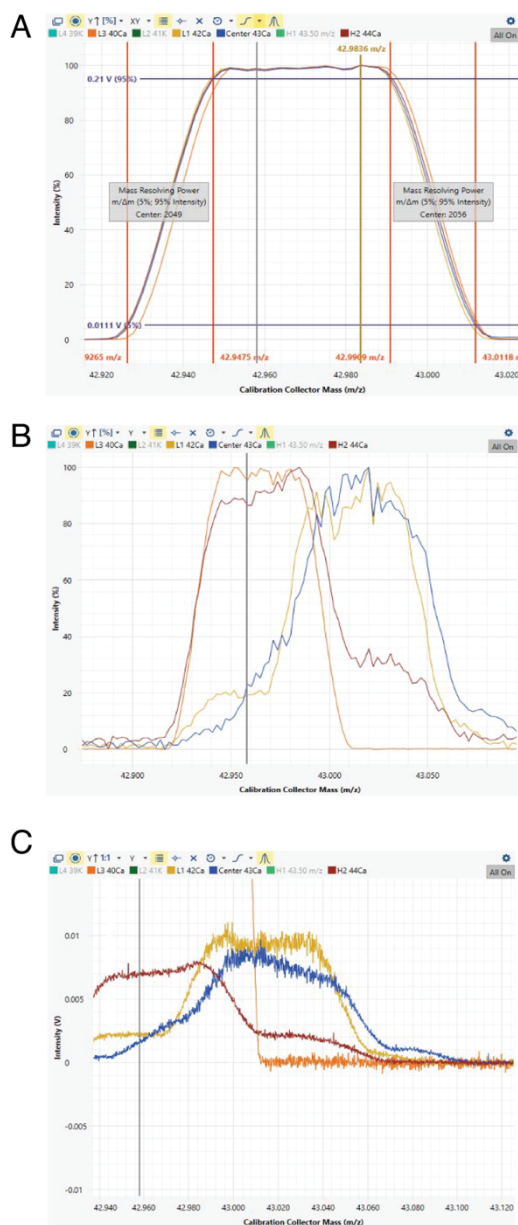

**Fig. S1** : A) Peak scan in the low-resolution mode with H<sub>2</sub> of the ICP-Ca Lyon solution at 250 ng mL<sup>-1</sup> using the set of parameters given in Table 1 showing the peak shape of the different Ca m/z values with the automated calculation of the resolution (mass resolving power) on the edges of the peak. B) Peak scan in the low-resolution mode with H<sub>2</sub> of a HNO<sub>3</sub> 0.05M solution in relative intensity (%), showing the interferences on the Ca m/z except the <sup>40</sup>Ca m/z. C) Peak scan in the low-resolution mode with H<sub>2</sub> of a HNO<sub>3</sub> 0.05M solution in absolute intensity (V), showing that the intensity of the interferences on the <sup>42</sup>Ca m/z is very significant, and that, despite positioning the peak centre on the low mass shoulder, the <sup>43</sup>Ca m/z is still interfered, highlighting the necessity of blank subtraction.

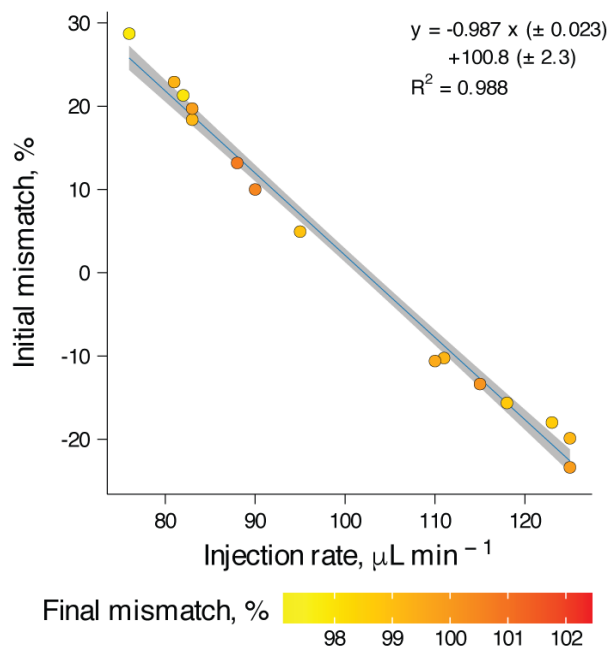

**Fig. S2** : Effect of modulating initial mismatch with injection rate on the final mismatch: for an initial mismatch ranging from -20% to +30%, the final corrected mismatch is generally  $\pm 2\%$ . A +1% initial mismatch is corrected with  $-1 \mu\text{L min}^{-1}$  and a -1% initial mismatch is corrected with  $+1 \mu\text{L min}^{-1}$ . Nominal injection rate is  $100 \mu\text{L min}^{-1}$ .

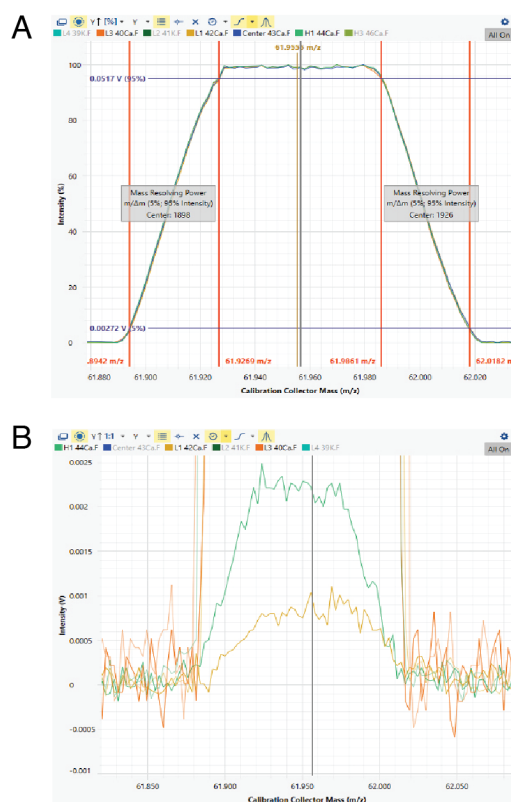

**Fig. S3** : A) Peak scan in the low-resolution mode with SF<sub>6</sub> of the ICP-Ca Lyon solution at 500 ng mL<sup>-1</sup> using the set of parameters given in Table 1 showing the peak shape of the different Ca m/z values with the automated calculation of the resolution (mass resolving power) on the edges of the peak. B) Peak scan in the low-resolution with SF<sub>6</sub> mode of a HNO<sub>3</sub> 0.05M solution in absolute intensity (V), showing the absence of any significant interferences on the CaF isotopes.

**Table S1 :**  $^{40}\text{Ca}$  intensity, corresponding noise-to-signal ratio, and Ca isotope compositions in the  $\text{H}_2$  mode, according to settings given in Table 1.

| Session | Date    | [Ca],<br>$\text{ng ml}^{-1}$ | $^{40}\text{Ca} \pm 2\text{SD}$<br>signal, V | n   | $^{40}\text{Ca} \pm 2\text{SD}$<br>blank, V | n   | Noise to<br>signal<br>ratio, % | $\delta^{44/40}\text{Ca}$<br>$\pm 2\text{SD}, \text{‰}$ | $\delta^{43/40}\text{Ca}$<br>$\pm 2\text{SD}, \text{‰}$ | $\delta^{42/40}\text{Ca}$<br>$\pm 2\text{SD}, \text{‰}$ | $\delta^{44/42}\text{Ca}$<br>$\pm 2\text{SD}, \text{‰}$ |
|---------|---------|------------------------------|----------------------------------------------|-----|---------------------------------------------|-----|--------------------------------|---------------------------------------------------------|---------------------------------------------------------|---------------------------------------------------------|---------------------------------------------------------|
| #55     | 2025/01 | 250                          | 142 ± 1.8                                    | 33  | 0.230 ± 0.027                               | 80  | 0.16                           | 0.000 ± 0.129                                           | -0.009 ± 0.194                                          | 0.006 ± 0.067                                           | -0.004 ± 0.135                                          |
| #56     | 2025/01 | 250                          | 145 ± 1.4                                    | 53  | 0.236 ± 0.035                               | 111 | 0.16                           | -0.006 ± 0.129                                          | -0.005 ± 0.125                                          | -0.002 ± 0.063                                          | -0.002 ± 0.14                                           |
| #66     | 2025/04 | 250                          | 258 ± 7.0                                    | 158 | 0.452 ± 0.112                               | 351 | 0.17                           | 0.008 ± 0.143                                           | -0.002 ± 0.116                                          | -0.001 ± 0.101                                          | 0.003 ± 0.048                                           |
| #67     | 2025/04 | 250                          | 260 ± 20.0                                   | 50  | 0.376 ± 0.192                               | 89  | 0.14                           | 0.005 ± 0.125                                           | -0.014 ± 0.103                                          | -0.001 ± 0.094                                          | 0.005 ± 0.057                                           |
| #68     | 2025/05 | 250                          | 201 ± 7.5                                    | 226 | 0.495 ± 0.275                               | 431 | 0.25                           | 0.006 ± 0.113                                           | -0.001 ± 0.137                                          | 0.004 ± 0.067                                           | 0.002 ± 0.054                                           |
| #76     | 2025/10 | 100                          | 44 ± 1.3                                     | 23  | 0.435 ± 0.045                               | 261 | 0.98                           | 0.004 ± 0.129                                           | 0.009 ± 0.203                                           | 0.004 ± 0.087                                           | 0.001 ± 0.117                                           |
| #76     | 2025/10 | 250                          | 113 ± 9.1                                    | 120 | 0.435 ± 0.045                               | 261 | 0.39                           | 0.004 ± 0.091                                           | 0.003 ± 0.092                                           | 0.002 ± 0.081                                           | 0.003 ± 0.072                                           |
| #76     | 2025/10 | 50                           | 22.0 ± 0.11                                  | 11  | 0.435 ± 0.045                               | 261 | 2                              | 0.003 ± 0.147                                           | -0.018 ± 0.134                                          | -0.003 ± 0.063                                          | 0.004 ± 0.176                                           |

**Table S2:** Ca isotope compositions of the CRMs measured in this study. n and N stand for the number of measurements and the number of digested aliquots, respectively.

| CRM ID    | $\delta^{44/40}\text{Ca}$<br>$\pm 2\text{SD}, \text{‰}$ | $\delta^{43/40}\text{Ca}$<br>$\pm 2\text{SD}, \text{‰}$ | $\delta^{42/40}\text{Ca}$<br>$\pm 2\text{SD}, \text{‰}$ | $\delta^{44/42}\text{Ca}$<br>$\pm 2\text{SD}, \text{‰}$ | n  | N |
|-----------|---------------------------------------------------------|---------------------------------------------------------|---------------------------------------------------------|---------------------------------------------------------|----|---|
| BCR-184   | -1.40 ± 0.15                                            | -1.20 ± 0.06                                            | -0.68 ± 0.09                                            | -0.74 ± 0.057                                           | 3  | 1 |
| BCR-186   | -0.34 ± 0.01                                            | -0.30 ± 0.24                                            | -0.13 ± 0.00                                            | -0.22 ± 0.048                                           | 2  | 1 |
| BCR-380R  | -2.30 ± 0.03                                            | -1.70 ± 0.08                                            | -1.20 ± 0.07                                            | -1.1 ± 0.035                                            | 3  | 2 |
| BCR-383   | -1.21 ± 0.08                                            | -1.11 ± 0.04                                            | -0.77 ± 0.03                                            | -0.65 ± 0.01                                            | 3  | 1 |
| ERM-CD281 | -1.50 ± 0.18                                            | -1.20 ± 0.11                                            | -0.77 ± 0.13                                            | -0.75 ± 0.1                                             | 8  | 2 |
| ERM-CE464 | 0.41 ± 0.17                                             | 0.02 ± 0.01                                             | 0.19 ± 0.04                                             | 0.23 ± 0.08                                             | 2  | 1 |
| IAPSO     | 0.87 ± 0.11                                             | 0.67 ± 0.10                                             | 0.49 ± 0.07                                             | 0.39 ± 0.065                                            | 6  | 2 |
| SRM-1400  | -2.20 ± 0.17                                            | -1.70 ± 0.14                                            | -1.10 ± 0.11                                            | -1.1 ± 0.1                                              | 39 | 7 |
| SRM-1515  | -0.69 ± 0.19                                            | -0.54 ± 0.15                                            | -0.37 ± 0.11                                            | -0.31 ± 0.15                                            | 6  | 2 |
| SRM-1573  | -1.43 ± 0.03                                            | -1.11 ± 0.09                                            | -0.67 ± 0.06                                            | -0.56 ± 0.02                                            | 2  | 1 |
| SRM-1577c | 0.08 ± 0.13                                             | 0.081 ± 0.20                                            | 0.09 ± 0.03                                             | -0.029 ± 0.1                                            | 3  | 1 |
| Tort-3    | 0.63 ± 0.14                                             | 0.32 ± 0.21                                             | 0.33 ± 0.10                                             | 0.3 ± 0.058                                             | 7  | 2 |

**Table S3 :**  $^{40}\text{CaF}$  intensity, corresponding noise-to-signal ratio, and CaF isotope compositions in the  $\text{SF}_6$  mode, according to settings given in Table 1.

| Session | Date    | [Ca],<br>$\text{ng ml}^{-1}$ | $^{40}\text{CaF} \pm 2\text{SD}$<br>signal, V | n  | $^{40}\text{CaF} \pm 2\text{SD}$<br>blank, V | n   | Noise to<br>signal<br>ratio, % | $\delta^{44/40}\text{CaF}$<br>$\pm 2\text{SD}, \text{‰}$ | $\delta^{42/40}\text{CaF}$<br>$\pm 2\text{SD}, \text{‰}$ | $\delta^{44/42}\text{CaF}$<br>$\pm 2\text{SD}, \text{‰}$ |
|---------|---------|------------------------------|-----------------------------------------------|----|----------------------------------------------|-----|--------------------------------|----------------------------------------------------------|----------------------------------------------------------|----------------------------------------------------------|
| #9      | 2024/05 | 500                          | 62.6 ± 0.9                                    | 46 | 0.098 ± 0.055                                | 61  | 0.16                           | -0.002 ± 0.149                                           | -0.005 ± 0.089                                           | -0.004 ± 0.103                                           |
| #9      | 2024/05 | 250                          | 31.0 ± 0.9                                    | 88 | 0.072 ± 0.009                                | 140 | 0.23                           | -0.011 ± 0.150                                           | -0.006 ± 0.094                                           | -0.007 ± 0.102                                           |
| #24     | 2024/11 | 250                          | 23.7 ± 0.2                                    | 16 | 0.095 ± 0.004                                | 23  | 0.40                           | 0.002 ± 0.124                                            | 0.003 ± 0.080                                            | -0.001 ± 0.110                                           |
| #24     | 2024/11 | 500                          | 45.1 ± 5.7                                    | 73 | 0.101 ± 0.013                                | 73  | 0.22                           | -0.001 ± 0.132                                           | -0.002 ± 0.088                                           | 0.000 ± 0.087                                            |
| #38     | 2025/01 | 500                          | 34.7 ± 2.0                                    | 32 | 0.055 ± 0.007                                | 64  | 0.16                           | -0.001 ± 0.099                                           | -0.005 ± 0.097                                           | 0.001 ± 0.123                                            |
| #39     | 2025/01 | 500                          | 32.7 ± 2.2                                    | 54 | 0.060 ± 0.002                                | 105 | 0.18                           | -0.007 ± 0.137                                           | -0.000 ± 0.097                                           | 0.002 ± 0.137                                            |
